# Supplementary figures and images for: Knockdown of UTX/KDM6A Enriches Precursor Cell Populations in Urothelial Cell Cultures and Cell Lines
Source: MDPI journal article supplement (doi:10.3390/cancers12041023), 2020-04-21

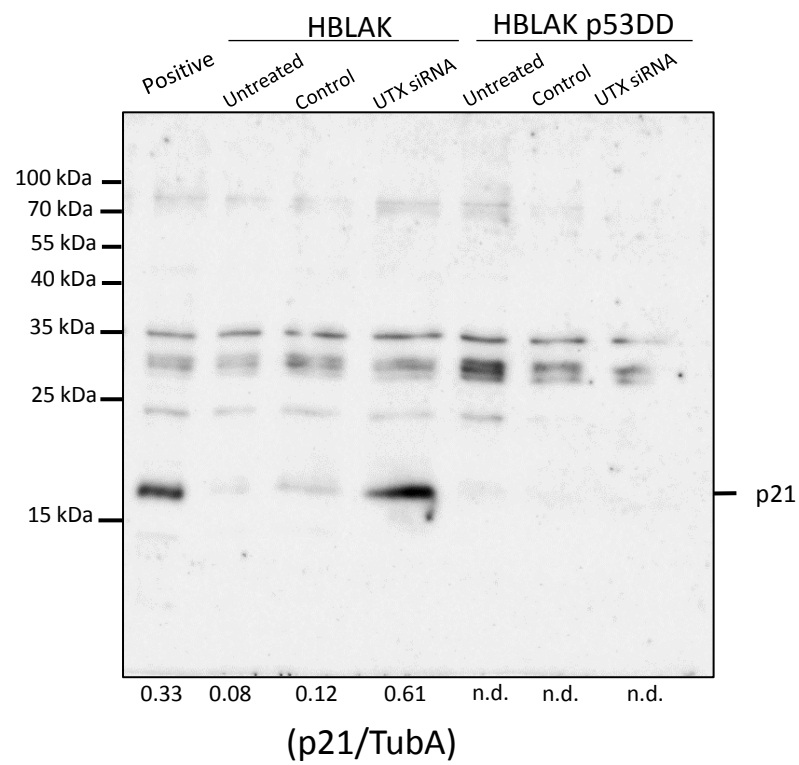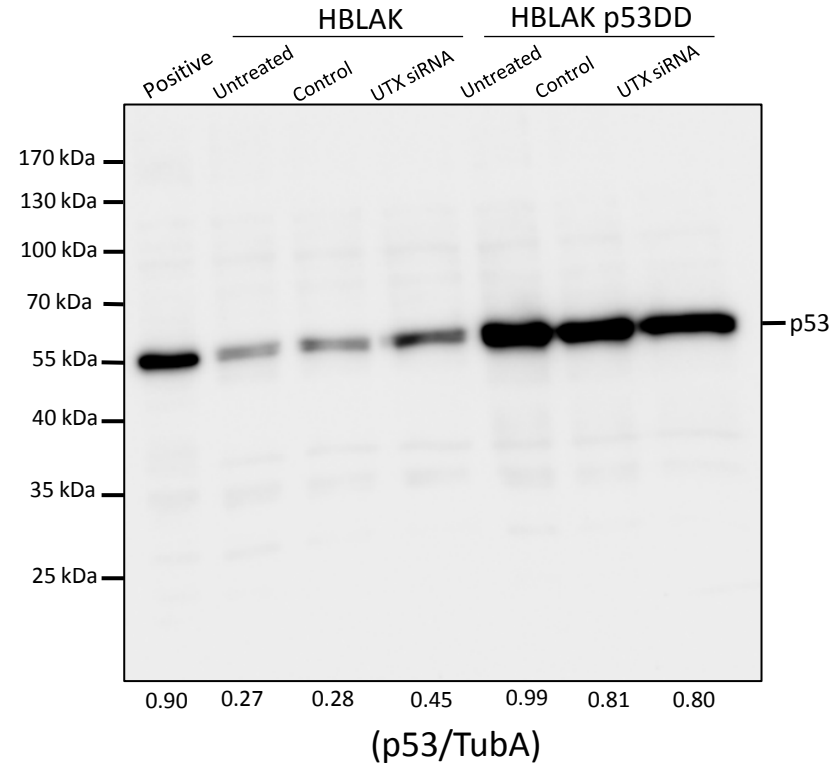

Blots: Fig. 8a

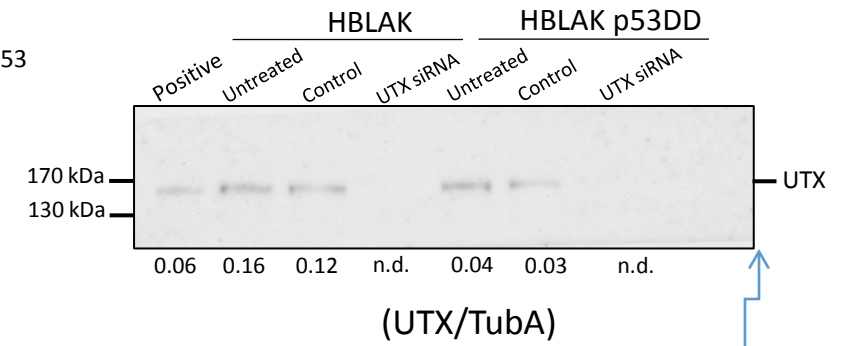

Cut

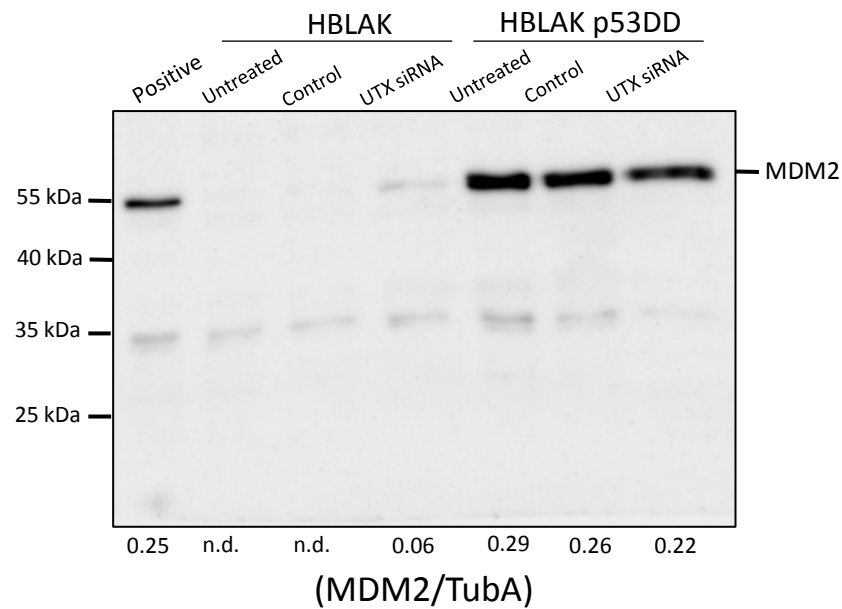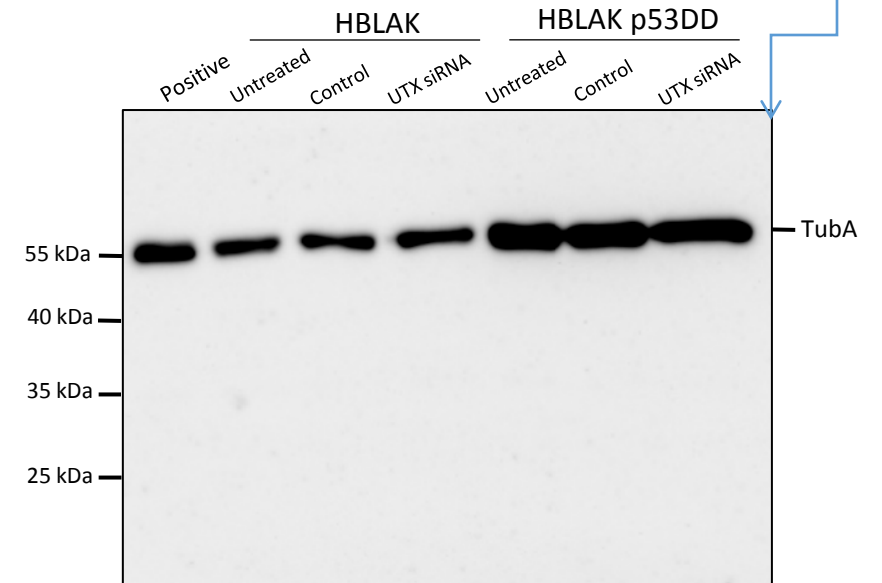

Blots: Fig. 9a

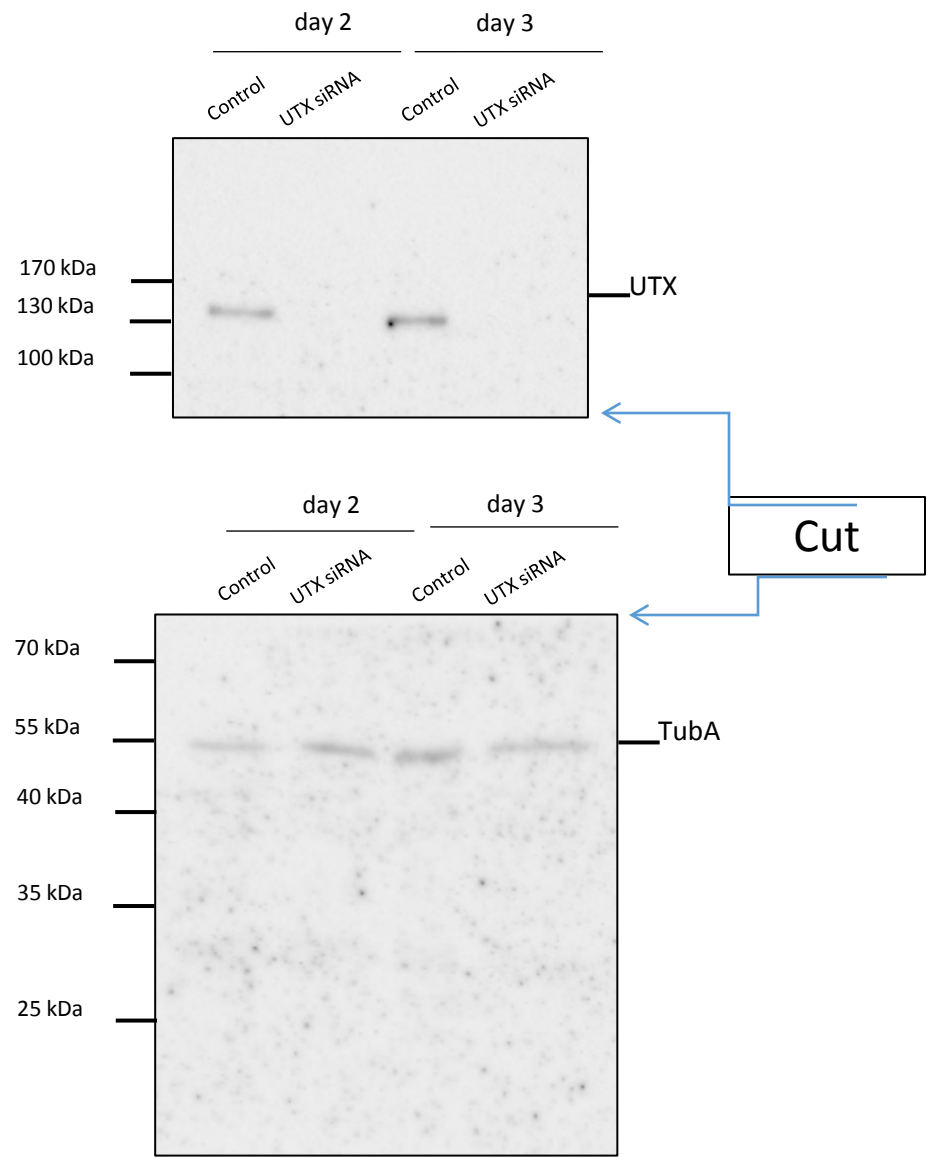

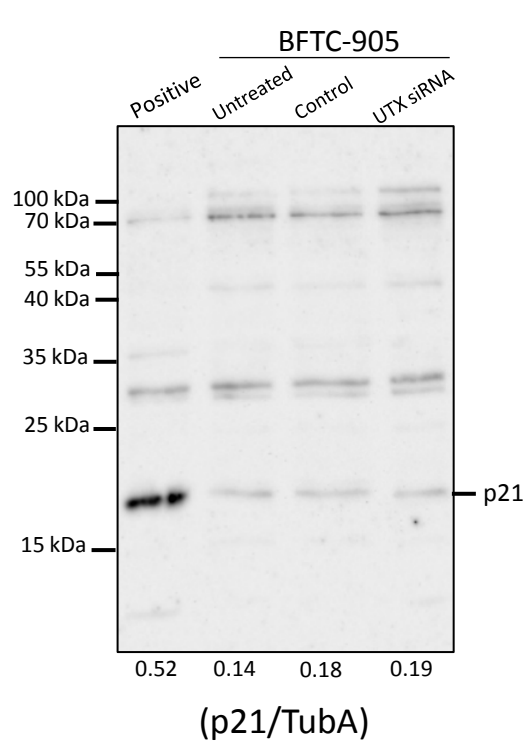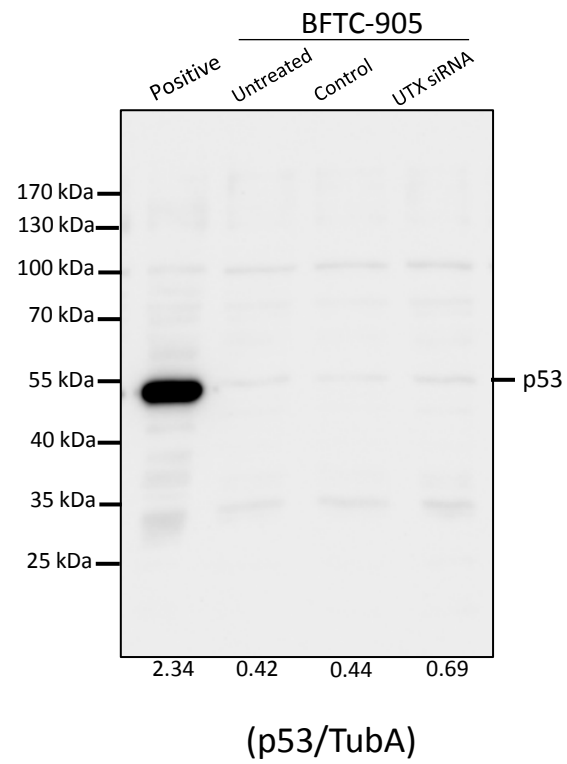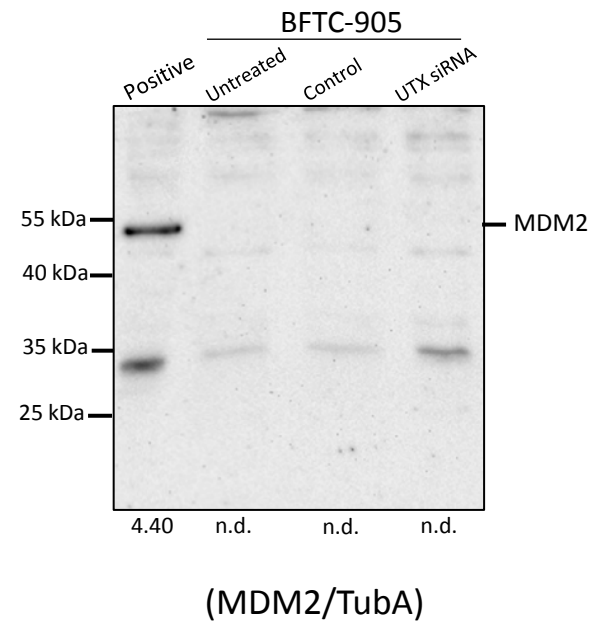

Blots: Fig. 9e

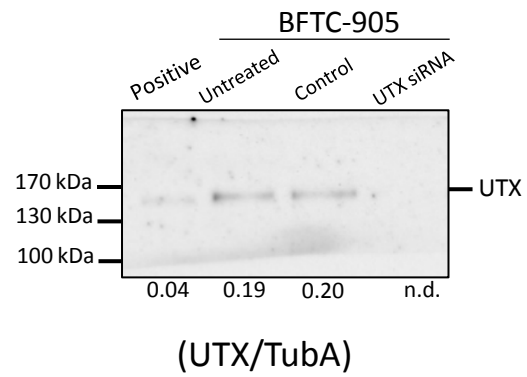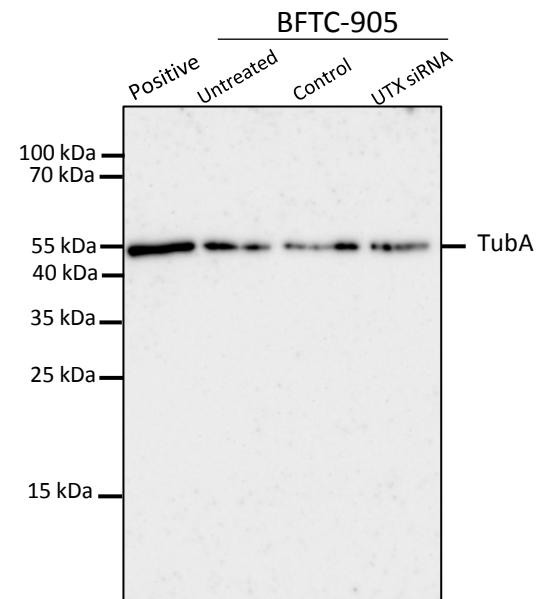

Blot: Fig. S1a

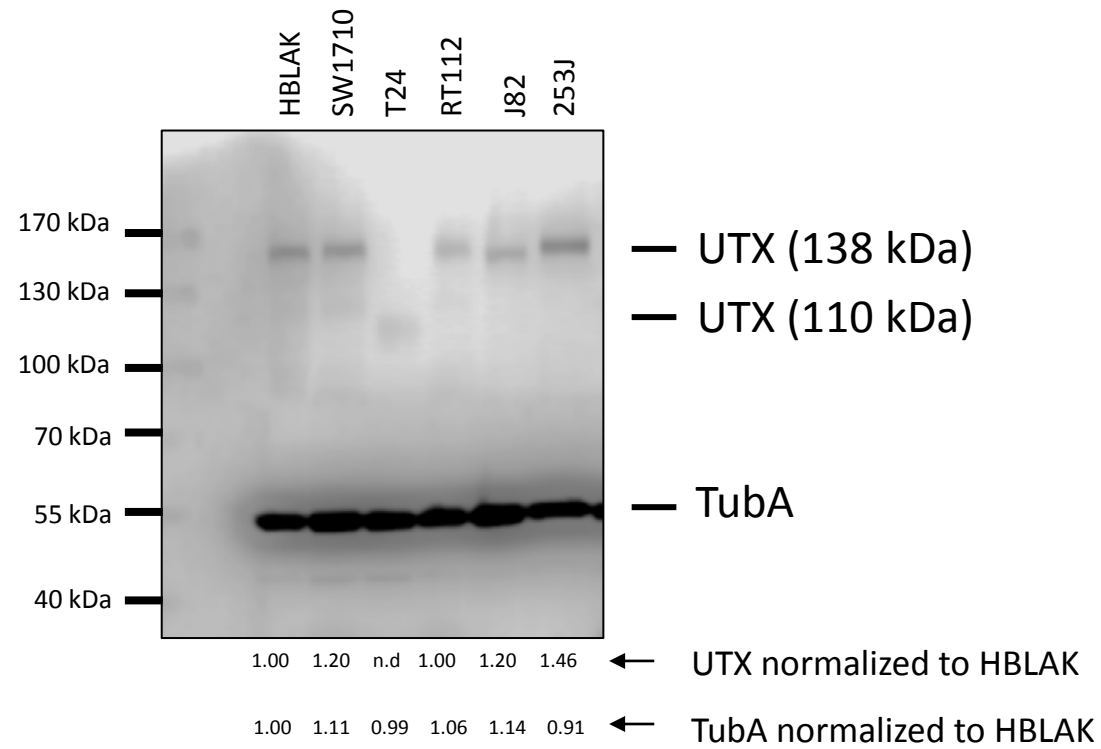

Blots: Fig. S1b

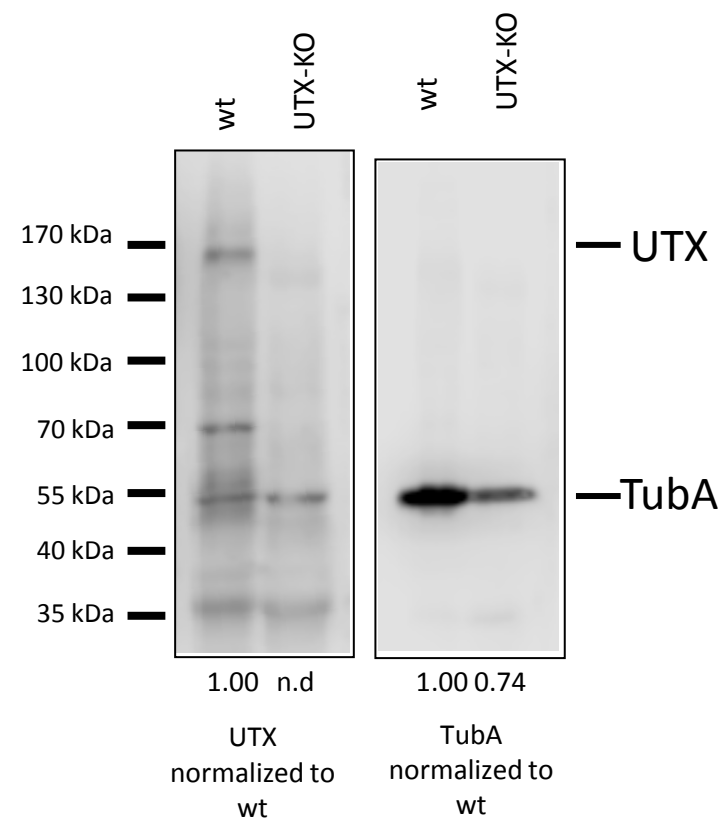

Blots: Fig. S1d

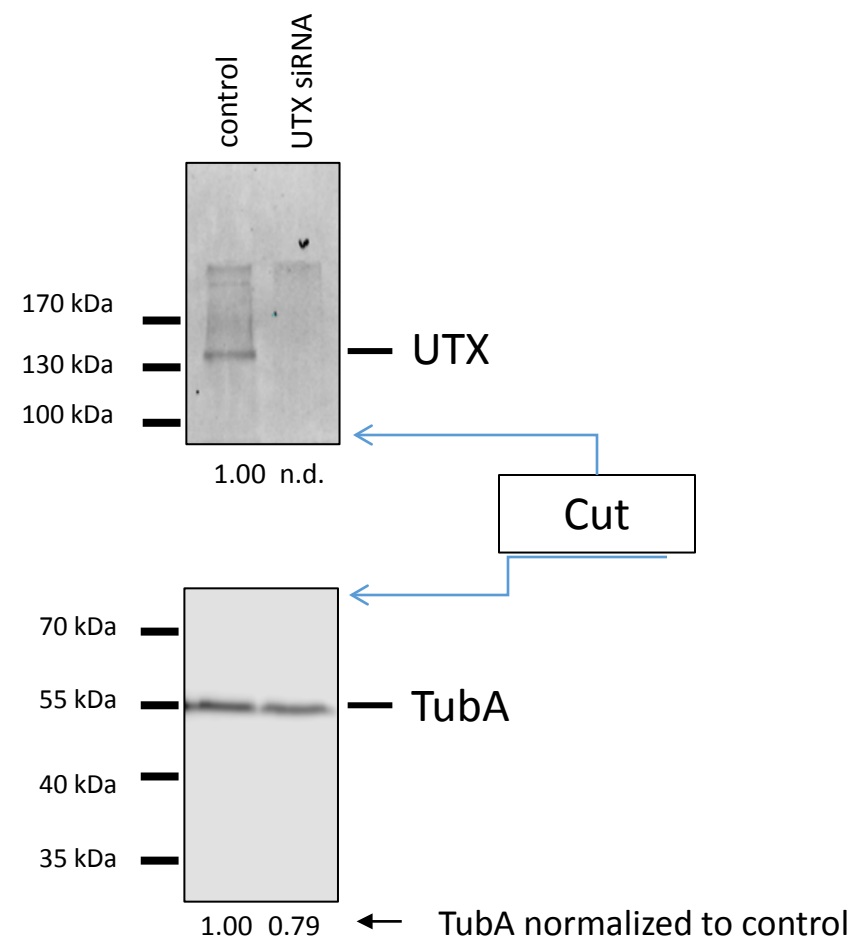

Blots: Fig. S1e

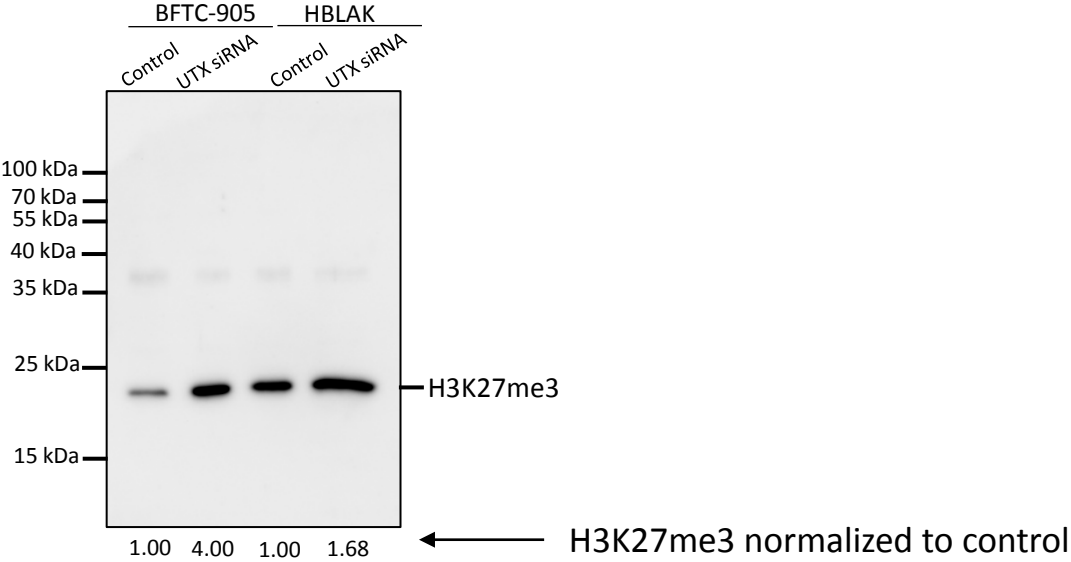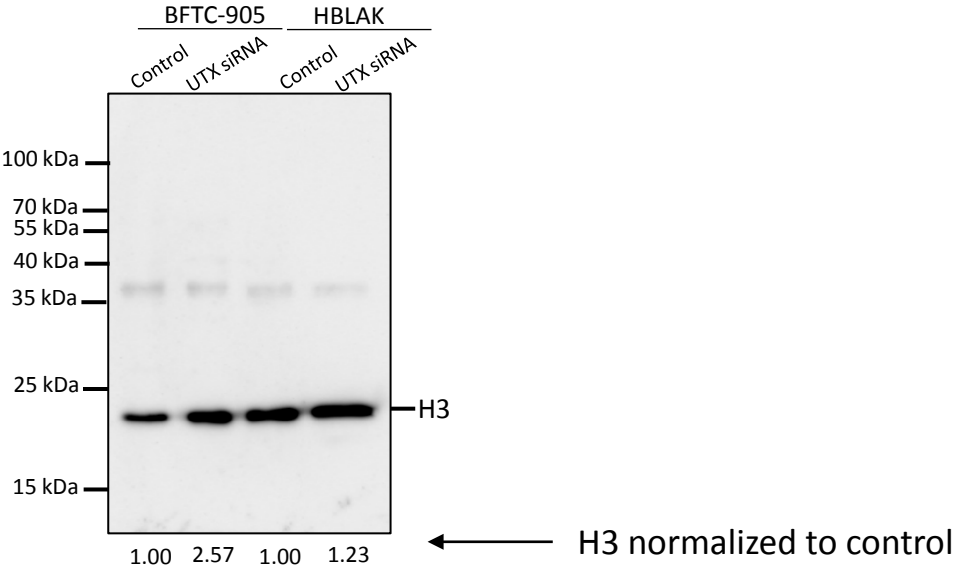

Supplement: s1 [file s1]
